# Supplementary material for: Regulation of protocadherin gene expression by multiple neuron-restrictive silencer elements scattered in the gene cluster
Source: PubMed Central journal article supplement — Nucleic Acids Res. 2010 Apr 12;38(15):4985–97. doi: 10.1093/nar/gkq246 (PMC2926608; doi:10.1093/nar/gkq246), 2010-04-12
Supplement: gkq246_1.pdf [file gkq246_1.pdf]

```

MAAQTVMFS-----ACPLGMSLMDNSPTLHCDLHENAPPPQLVMLANVAAVTAADG---DGGALDEKEMMELKTVG  fugu
MATQVMGQSSGGSLFNNSGNMGMALPNDMYDLHDL SKAELAAPQLI MLANVALTGEVNGSCCDYLVLGEEHQMAELMPVG  rat
-----
SSYLDSDEEDNFSRYTDDNQNKCFICI EYPESEFDPTVQVNPVVTGSGEDDRNKAETPPAGARPRPLASTKIPSEQDGKVN  fugu
DNHFSDSSEGELEESAELK-----G-DPSGLDNMELRSLELSVVEPQPVFBASAAPEVYSNKKDPAPEAPVAE  rat
-----
GPSGTRKKKPFYCKPCHFQAQNEQQFVEHLRTHSASKMMVNVHVEGRSRNKTRDA DAAASGEAENSGGDTGDSKGLIRCE  fugu
DKCKNLKAKPFRCKPKQYEA ESEEQEVHHRVHSAKFFVEESA EKQAKARESGASPSEEGEFS-----KGP I RCD  rat
-----
RCGYNTNRFEDHYIAHLKHHSKFGDDH RVEFKTLCOPYTTVSYHWRKHLRNHFP SKLHTCSQCSYFSDRKNYIQHIRTHT  fugu
RCGYNTNRYDHYTAHLKHHLRAGDN ERVYKCI ICTYTTVSEYHWRKHLRNHFRKVVYTC SKCN YFSDRNNYVOHV RTHT  rat
-----
GMRPFQCLYCDYSSSQKTHLTRHMRTHSGERPFKCESCNYLAAHQHEVTRHARQVHNGPKPLSCPYCDYKTADRSNYKKH  fugu
GERPKYKCELCPYSSSQKTHLTRHMRTHSGEKPFKCDQCNVVASNQH E VTRHARQVHNGPKPLNCPHCDYKTADRSNFKKH  rat
-----
VELHLNPRQFLCPVCKYAASKKCNLQYHIKSRHAGCN-VAMDI SKVKLRVKKAG----PNGAEENSSVHKRSDTREDFEV  fugu
VELHVNPRQFLCPVCDYAASKKCNLQYHFKSKHPTCP SKTMDVSKVKLKKTKRREADLHRDAAAAAATEQTDT EQAKTKGV  rat
-----
DRDNRDKGTDANPINLSIRRSRFPGNSSQAQTEAPDKVQDKTSRSE-----REKFGKVKEQEKRIITTRQKVKRAHEKVP  fugu
LASARSRSERPVKGVGKDV EKEKKPCSNASVVQVTRTRKSAVETKAAEGKHTDGQTCNNAEKSSKAKSKRKMDAEAHPS  rat
-----
EEIHPGSTTATKIGDGKAKTKVRKIQAE EQNPTEPNQTLKPDQRQSEDKRKM RPKDKENQSSRKKKCKLNKSRK----  fugu
AEPVTEGPVTKKKKTESKPKTSGEV PKGSRVEDRKADKQOSASIKKGGKKTALKTKTAKKGSKLAPKWVGHTEPSSEMAQ  rat
-----
-----SGSQHSEKCS-----RHADDSQNLISG-----FOOTEPEKKVAKEKAPKRRSAEAPG  fugu
GGESPVPALTQAVVTPSGSTQTELS SPM DIAQTEPAQMDV SQTGPPQVQRPLPVEPAOLEPSPPEPPQVEPPACVEPEP  rat
-----
PTKSLFDMPEPKTRR-----TKGAEKLHPIPEEGFGK  fugu
BVEPPCFMEBAEMEPSPPMESPQVEPPHLEPPLPMBELPQVELPPVEDCQKELPSVEHAQTKVAQTGPTQVGAVQEPEPLS  rat
-----
IGDTGSTFTTKQKRSRNVSVNEDNLAVNKISGGPAQPQGSTENEDTEP---NSSATKEDSPGALGLDPRCAQDAPPNTE  fugu
VSEPPQVKLRRSSPKDRAK EKLSVLSEMARQEQV LIEVGLVEVRDSQLLKASKSAPDL PAPPSPLEPKGHLRREETPKD  rat
-----
PQLSSDSSLTRVCVTD PQNTIVEKVPDPSRLPPEPPPHRPSRPAAPAVPAQPVHG-----PAEKVADGRL  fugu
QEMFSDGEGNKVSPLEKGGTEBAGESRAELAAEMESTALSSEQSSNAPDGETLHSECQADSTAVCEMEVDTEQKTRV  rat
-----
DEDASLMFSHPTSP-----PTLVLPVDLAKPADPEDDEGIHSSHEGGSDIISDSASEGSEDSGLNSNGGSGKLAND  fugu
LKDSAVEPVSFLNPRVDPEAAAPAVVASPPTLAESQEIDEDEGIHSHD--GSDLSDNMSEGSDDSGLHGARPAPQEAATS  rat
-----
PETPTAELPTPTELKGHMCI FCDRCPELEAAYRRHLNRHLVNVY YMDTAAGAQR  fugu
-KSGKEGLAVKVTEGEFVCFI CDRSERKEKDYSKHLNRHLVNVYFLEBAAEEOE  rat
-----

```

**Figure S1. Amino acid sequence comparison of fugu and rat NRSF/REST**  
 Identical residues between fugu and rat are shaded. The C2H2 zinc finger motifs are highlighted by single underline and labeled as zf1 to zf9. The two repressor domain sequences at the N-terminal and C-terminal are highlighted by double underline.
