# Supplementary material for: Regulation of protocadherin gene expression by multiple neuron-restrictive silencer elements scattered in the gene cluster
Source: PubMed Central journal article supplement — Nucleic Acids Res. 2010 Apr 12;38(15):4985–97. doi: 10.1093/nar/gkq246 (PMC2926608; doi:10.1093/nar/gkq246), 2010-04-12
Supplement: gkq246_2.pdf [file gkq246_2.pdf]

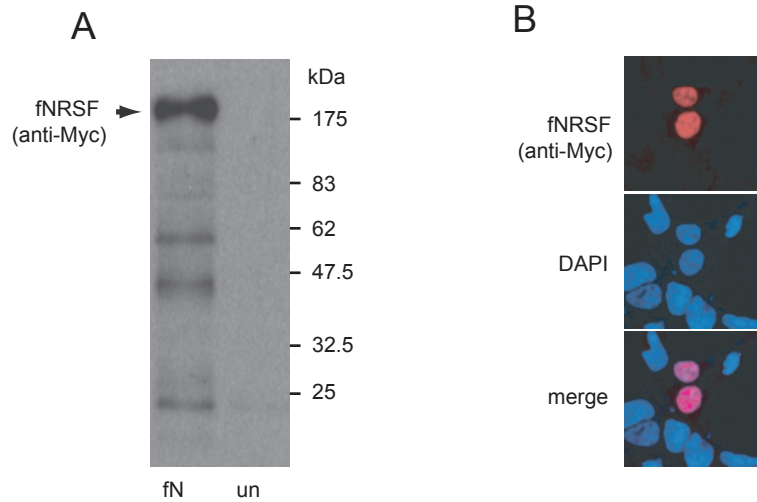

**Figure S2. Overexpression of fugu NRSF/REST in transiently-transfected HEK293 cells**

**A:** *Western* blot probed by anti-myc antibody showing fugu NRSF/REST expression in HEK293 cells transfected with pCMVmyc-fNRSF. **fN:** nuclear extracts from pCMVmyc-fNRSF-transfected cells; **un:** nuclear extracts from mock (empty pCMVmyc plasmid)-transfected cells. Arrow head indicates the full length fugu NRSF/REST. Notably, in addition to the full length, various myc epitope-containing NRSF/REST fragments are also present in the lysates of the pCMVmyc-fNRSF transfected cells. These presumably represent the partially-translated or degraded fugu NRSF/REST, owing to an overexpression system. **B:** HEK293 cells transfected with pCMVmyc-fNRSF were immunostained by anti-myc antibody (upper panel) and co-stained by DAPI (middle panel), showing that fugu NRSF/REST is predominantly localized in the nucleus (lower panel).
